# Supplementary material for: Impact of COVID-19 restrictions on behavioural and psychological symptoms in home-dwelling people with dementia: a prospective cohort study (PAN.DEM).
Source: HighWire-hosted journal article supplement (doi:10.1136/bmjopen-2021-050628), 2022-01-01
Supplement: bmjopen-2021-050628supp001_data_supplement.pdf [file bmjopen-2021-050628supp001_data_supplement.pdf]

## The PAN.DEM assessment

Respondents: informal carers in the LIVE@Home.Path trial

1 **Date of birth:** mm.dd.yyyy

2 **Are you temporarily laid off due to the covid-19 restrictions?**

- Yes  
 No  
 Not applicable

3 **During the last month, have you been quarantined due to covid-19?**

- Yes  
 No

**If yes, please specify:**

---

4 **Does the person with dementia have insight into the covid-19 situation?**

- To no degree  
 Partial  
 Sufficient

5 **To what degree are you concerned that the person with dementia will be infected with covid-19?**

Tick a number on the scale from 0-10 (0=not at all; 10=as much as possible):

|-----|  
0    1    2    3    4    5    6    7    8    9    10

6 **To what degree are you concerned that you yourself will be infected with covid-19?**

Tick a number on the scale from 0-10 (0=not at all; 10=as much as possible)

|-----|  
0    1    2    3    4    5    6    7    8    9    10

7 **To what degree are you concerned that you yourself will be infected with covid-19?**

Tick a number on the scale from 0-10: (0=not at all; 10=as much as possible):

|   |   |   |   |   |   |   |   |   |   |    |
|---|---|---|---|---|---|---|---|---|---|----|
| 0 | 1 | 2 | 3 | 4 | 5 | 6 | 7 | 8 | 9 | 10 |
|---|---|---|---|---|---|---|---|---|---|----|

8 **To what degree are your concern for own infection sourced from your responsibilities as carer?**

Tick a number on the scale from 0-10:(0=not at all; 10=as much as possible):

|   |   |   |   |   |   |   |   |   |   |    |
|---|---|---|---|---|---|---|---|---|---|----|
| 0 | 1 | 2 | 3 | 4 | 5 | 6 | 7 | 8 | 9 | 10 |
|---|---|---|---|---|---|---|---|---|---|----|

9 **As a response to the covid-19 pandemic, did you discuss advanced care planning with the person with dementia?** If yes, please specify below.

10 **Did the covid-19 restrictions have any consequences for the healthcare services provided by the municipality for the person with dementia** (e.g. home nursing services, activity groups, day care centre, respite care).

|                          |     |
|--------------------------|-----|
| <input type="checkbox"/> | Yes |
| <input type="checkbox"/> | No  |

**If yes, specify per Resource Utilization in Dementia Version 4 section A2.2.5**

<sup>1 2</sup>

11 **Have you avoided or postponed contacts with health care professionals due to the COVID-19 pandemic and the restrictions?**

|                          |     |
|--------------------------|-----|
| <input type="checkbox"/> | Yes |
| <input type="checkbox"/> | No  |

**If yes, please specify:**

12 **Informal care time assessed by Resource Utilization in Dementia Version 4 section B1.2** <sup>1 2</sup>

- 13 **Has the food habits and appetite of the person with dementia changed under to the covid-19 restrictions?**

|                          |     |
|--------------------------|-----|
| <input type="checkbox"/> | Yes |
| <input type="checkbox"/> | No  |

**If yes, please specify:** Tick one or several items.

|                          |                                                                        |
|--------------------------|------------------------------------------------------------------------|
| <input type="checkbox"/> | Eats/drinks less                                                       |
| <input type="checkbox"/> | Loss of appetite                                                       |
| <input type="checkbox"/> | Eats more                                                              |
| <input type="checkbox"/> | Eats mote unhealthy food                                               |
| <input type="checkbox"/> | Has stopped preparing food him/herself                                 |
| <input type="checkbox"/> | Heats prepared food                                                    |
| <input type="checkbox"/> | Is unable to maintain diet without help from informal or formal carers |

- 14 **Neuropsychiatric inventory (12 item version) <sup>3</sup>**

- 15 **Cornell Scale of Depression in Dementia <sup>4</sup>**

- 16 **Has the pandemic had any consequences for services provided by volunteers?**

|                          |     |
|--------------------------|-----|
| <input type="checkbox"/> | Yes |
| <input type="checkbox"/> | No  |

**If yes, specify as applicable:**

---

- 17 **Has the covid-19 restrictions increased your interest in assistive technology?**

|                          |     |
|--------------------------|-----|
| <input type="checkbox"/> | Yes |
| <input type="checkbox"/> | No  |

**If yes, specify as applicable** including complaint/need, type of technology, if acquired, including privately financed or municipally funded:

---

- 18 **Compared to pre-pandemic levels, what sort of contact have you had with the person with dementia?** Tick one or several items.

|                          |                      |
|--------------------------|----------------------|
| <input type="checkbox"/> | Unchanged            |
| <input type="checkbox"/> | Increased            |
| <input type="checkbox"/> | Reduced              |
| <input type="checkbox"/> | No contact at all    |
| <input type="checkbox"/> | More digital contact |

- 19 **Have you implemented measures and restrictions to prevent transmission of covid-19 to the person with dementia?** Please specify as applicable:

- 20 **Compared to immediately before the pandemic, how would you rank your own total situation as a carer?** <sup>5</sup>

Tick a number from -5 (much worse) to 5 (much better), via 0 (no change).

|    |    |    |    |    |   |   |   |   |   |   |  |  |
|----|----|----|----|----|---|---|---|---|---|---|--|--|
|    |    |    |    |    |   |   |   |   |   |   |  |  |
| -5 | -4 | -3 | -2 | -1 | 0 | 1 | 2 | 3 | 4 | 5 |  |  |

- 21 **Do you have any additional comments?** Please specify as applicable:

## References

1. Wimo A, Gustavsson A, Jonsson L, et al. Application of Resource Utilization in Dementia (RUD) instrument in a global setting. *Alzheimers Dement* 2013;9(4):429-35 e17. doi: 10.1016/j.jalz.2012.06.008 [published Online First: 2012/11/13]
2. Wimo A, Jonsson L, Zbrozek A. The Resource Utilization in Dementia (RUD) instrument is valid for assessing informal care time in community-living patients with dementia. *J Nutr Health Aging* 2010;14(8):685-90. [published Online First: 2010/10/06]
3. Cummings J. The Neuropsychiatric Inventory: Development and Applications. *Journal of Geriatric Psychiatry and Neurology* 2020;33(2):73-84.
4. Alexopoulos GS, Abrams RC, Young RC, et al. Cornell Scale for Depression in Dementia. *Biol Psychiatry* 1988;23(3):271-84. doi: 10.1016/0006-3223(88)90038-8 [published Online First: 1988/02/01]
5. Guy W. ECDEU assessment manual for psychopharmacology: U.S. Dept. of Health, Education, and Welfare, Public Health Service, Alcohol, Drug Abuse, and Mental Health Administration, National Institute of Mental Health, Psychopharmacology Research Branch, Division of Extramural Research Programs 1976.
