# Supplementary material for: Impact of COVID-19 restrictions on behavioural and psychological symptoms in home-dwelling people with dementia: a prospective cohort study (PAN.DEM).
Source: HighWire-hosted journal article supplement (doi:10.1136/bmjopen-2021-050628), 2022-01-01
Supplement: bmjopen-2021-050628supp002_data_supplement.pdf [file bmjopen-2021-050628supp002_data_supplement.pdf]

Supplementary table A: Post-hoc analysis of associations between worsening in behavioural and psychological symptoms (from the pre-pandemic to the pandemic assessment) and pre-pandemic traits for the 104 persons with dementia.

|                                                          | mean (SD)   | P    |
|----------------------------------------------------------|-------------|------|
| NPI-12 total score                                       |             |      |
| Use of psychotropic drugs (N05A, N05B, N05C, N06A, N06D) |             |      |
| Yes                                                      | 0.58 (0.50) | 0.36 |
| No                                                       | 0.47 (0.51) |      |
| Use of antidementia drugs (N06D)                         |             |      |
| Yes                                                      | 0.58 (0.50) | 0.85 |
| No                                                       | 0.48 (0.50) |      |
| Receiving the LIVE-intervention <sup>#</sup>             |             |      |
| Yes                                                      | 0.57 (0.51) | 0.81 |
| No                                                       | 0.54 (0.40) |      |
| NPI-12 psychosis subsyndrome                             |             |      |
| Use of antipsychotic drugs (N05A)                        |             |      |
| Yes                                                      | 0.33 (0.52) | 0.92 |
| No                                                       | 0.36 (0.48) |      |
| Receiving the LIVE-intervention <sup>#</sup>             |             |      |
| Yes                                                      | 0.29 (0.46) | 0.45 |
| No                                                       | 0.37 (0.49) |      |
| CSDD total score                                         |             |      |
| Use of antidepressant drugs (N06A)                       |             |      |
| Yes                                                      | 0.63 (0.50) | 0.88 |
| No                                                       | 0.61 (0.49) |      |
| Receiving the LIVE-intervention <sup>#</sup>             |             |      |
| Yes                                                      | 0.62 (0.50) | 0.97 |
| No                                                       | 0.61 (0.49) |      |

Table legend:

Pre-pandemic: Six-month assessment of the parent trial (12 Dec 2019 to 11 Mar 2020). Pandemic: PAN.DEM assessment (20 Apr. to 15 May 15 2020). SD: standard deviation. P: P values for difference between groups by unequal variances t-test, \* indicates two-tailed  $P < .05$ . NPI-12: Neuropsychiatric Inventory, twelve item version: with psychosis subsyndrome constituting delusions and hallucinations. CSDD: Cornell Scale of Depression in Dementia. Change dichotomised into worsening/not worsening. Drugs classified by the Anatomical Therapeutic Chemical Index. <sup>#</sup>21 (20%) received the LIVE-intervention: Multicomponent intervention of the parent trial comprising Learning, Innovation, Volunteers, and Empowerment.
