# Supplementary material for: Impact of COVID-19 restrictions on behavioural and psychological symptoms in home-dwelling people with dementia: a prospective cohort study (PAN.DEM).
Source: HighWire-hosted journal article supplement (doi:10.1136/bmjopen-2021-050628), 2022-01-01
Supplement: bmjopen-2021-050628supp003_data_supplement.pdf [file bmjopen-2021-050628supp003_data_supplement.pdf]

Supplementary table B: Comparison of PAN.DEM study sample to those not included yet still in parent trial.

|                                                             | Pre-pandemic six-month assessment of parent trial (n=237) |                                              | P       |
|-------------------------------------------------------------|-----------------------------------------------------------|----------------------------------------------|---------|
|                                                             | PAN.DEM study sample (n=104)                              | Not included in PAN.DEM study sample (n=133) |         |
| <i>Person with dementia</i>                                 |                                                           |                                              |         |
| Age, mean (SD)                                              | 82 (7)                                                    | 83 (7)                                       | 0.38    |
| Female gender, n (%)                                        | 63 (61)                                                   | 86 (65)                                      | 0.47    |
| Residency                                                   |                                                           |                                              | 0.93    |
| Living alone, n (%)                                         | 46 (44)                                                   | 54 (41)                                      |         |
| Coresiding with the reporting informal carer, n (%)         | 46 (44)                                                   | 59 (44)                                      |         |
| Coresiding with someone else than the informal carer, n (%) | 12 (12)                                                   | 16 (12)                                      |         |
| Dementia aetiology by ICD-10                                |                                                           |                                              | 0.003*  |
| Alzheimer's Disease, n (%)                                  | 45 (43)                                                   | 43 (32)                                      |         |
| Vascular Dementia, n (%)                                    | 6 (6)                                                     | 2 (2)                                        |         |
| Dementia in other diseases classified elsewhere, n (%)      | 10 (10)                                                   | 4 (3)                                        |         |
| Unspecified Dementia, n (%)                                 | 43 (41)                                                   | 82 (62)                                      |         |
| MMSE, range 0-30, median [IQR]                              | 21 [18, 24]                                               | 21 [18, 23]                                  | 0.83    |
| FAST, range 1-7, median [IQR]                               | 4 [4, 4]                                                  | 4 [4, 5]                                     | 0.15    |
| GMHR, range 1-4, median [IQR]                               | 3 [2, 3]                                                  | 3 [3, 4]                                     | <0.001* |
| PSMS, range 6-30, median [IQR]                              | 11 [9, 14]                                                | 11 [9, 14]                                   | 0.40    |
| IADL, range 8-31, median [IQR]                              | 22 [18, 27]                                               | 22 [16, 27]                                  | 0.65    |
| Drugs in general, total number, median [IQR]                | 6 [4, 8]                                                  | 4 [2, 7]                                     | 0.002*  |
| <i>Psychotropic drugs</i>                                   |                                                           |                                              |         |
| Total number, median [IQR]                                  | 1 [0, 1]                                                  | 1 [0, 2]                                     | 0.02*   |
| Regularly, median [IQR]                                     | 1 [0, 1]                                                  | 1 [0, 1]                                     | 0.07    |
| On-demand, median [IQR]                                     | 0 [0, 0]                                                  | 0 [0, 0]                                     | 0.06    |
| <i>Health care services</i>                                 |                                                           |                                              |         |
| Daily Home Nursing, n (%)                                   | 52 (50)                                                   | 46 (35)                                      | 0.02*   |
| Weekly Day Care, n (%)                                      | 29 (28)                                                   | 37 (28)                                      | 0.99    |

|                                                           |              |              |      |
|-----------------------------------------------------------|--------------|--------------|------|
| Respite Care (In-Home and Out-of-Home), n (%)             | 2 (2)        | 9 (7)        | 0.08 |
| Volunteering services, n (%)                              | 8 (8)        | 22 (17)      | 0.14 |
| <i>Behavioural and psychological symptoms of dementia</i> |              |              |      |
| NPI-12 total score, range 0-144, median [IQR]             | 16 [4.5, 29] | 12.5 [4, 28] | 0.74 |
| CSDD total score, range 0-38, median [IQR]                | 5 [3, 9]     | 6 [2, 12]    | 0.32 |
| <i>Informal carer</i>                                     |              |              |      |
| Age, mean (SD)                                            | 65 (12)      | 68 (12)      | 0.17 |
| Female gender, n (%)                                      | 68 (65)      | 83 (62)      | 0.64 |
| Kinship to the person with dementia                       |              |              | 0.06 |
| Spouse, n (%)                                             | 44 (42)      | 58 (44)      |      |
| Child, n (%)                                              | 58 (56)      | 63 (47)      |      |
| Others, n (%)                                             | 2 (2)        | 12 (9)       |      |

## Table legend:

n: dyads (person with dementia and informal carer). IQR: Interquartile range. SD: standard deviation. P: P values for difference between groups by two sample t-test, Wilcoxon-Mann-Whitney test, or Pearson chi-squared test, \* indicates  $P < .05$  ICD-10: International Statistical Classification of Diseases and Related Health Problems. MMSE: Mini-Mental Status Examination, at inclusion. FAST, Functional Assessment Staging, at inclusion. GMHR: General Medical Health Rating Scale. PSMS: Physical Self-Maintenance Scale. IADL: Instrumental Activities of Daily Living Scale. NPI-12: Neuropsychiatric Inventory. CSDD: Cornell Scale for Depression in Dementia. Drugs were classified by the Anatomical Therapeutic Chemical Index; antipsychotics, anxiolytics, hypnotics/sedatives, antidepressants, and anti-dementia drugs constituted psychotropic drugs.
